# Supplementary material for: Kojic Acid Gene Clusters and the Transcriptional Activation Mechanism of Aspergillus flavus KojR on Expression of Clustered Genes
Source: MDPI journal article supplement (doi:10.3390/jof9020259), 2023-02-15
Supplement: s1 [file s1]

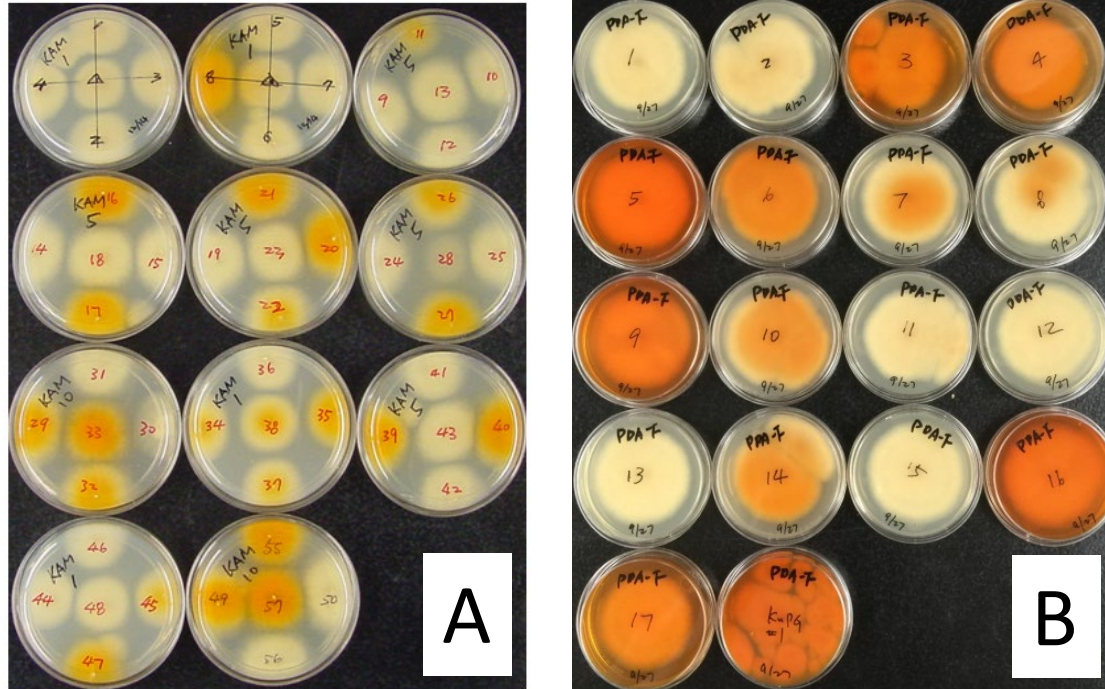

Figure S1. Examination of KA production by *kojR* complemented transformants of *A. flavus*  $\Delta$ *kojR*#4. (A) *kojR* expression was driven by *A. nidulans* *gpdA* promoter, and transformants were transferred onto KAM plates. (B) *kojR* expression was driven by *A. flavus* *gpiA* promoter, and transformants were transferred onto PDA plates supplemented with ferric ion. Color intensity is indicative of the KA amount produced.

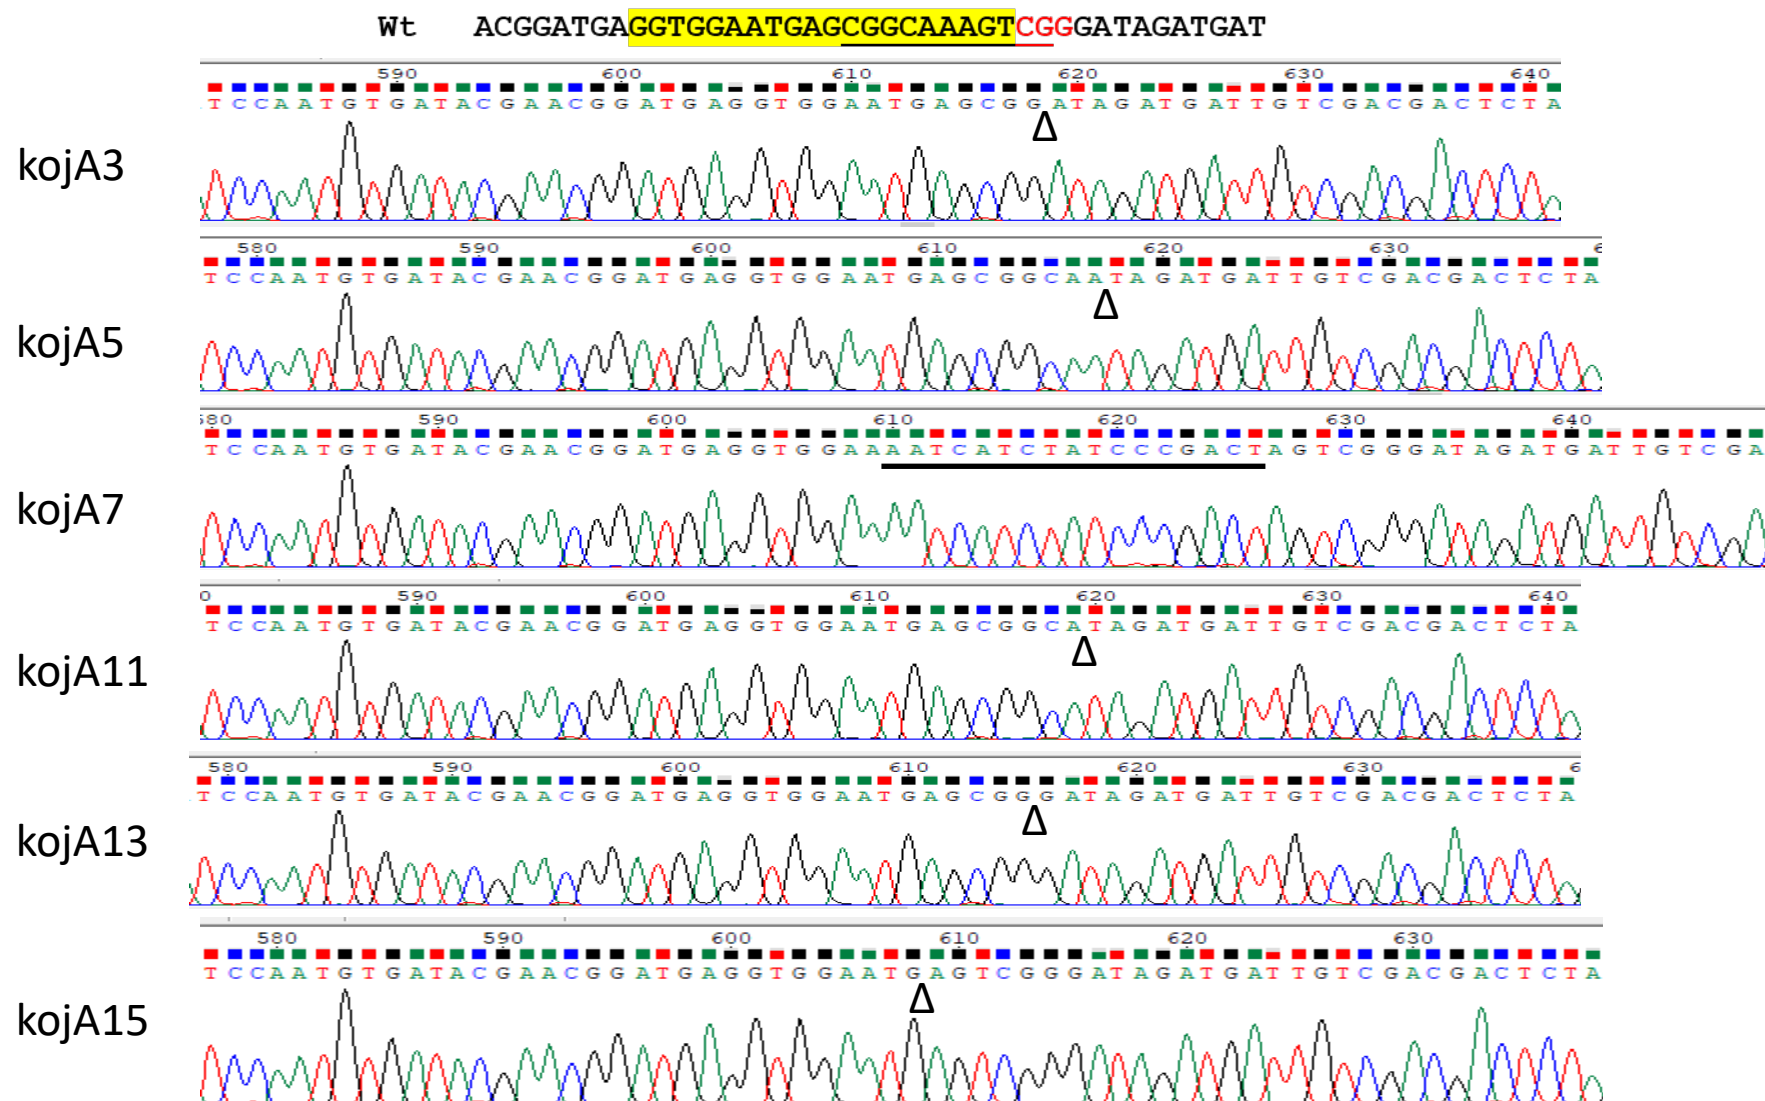

Figure S2. Sequencing chromatograms showing locations of deletions and an insertion in the KojR-binding motif of *A. flavus kojA* promoter.

|       |        |                                                              |        |
|-------|--------|--------------------------------------------------------------|--------|
| kojT3 | 431    | GCTCGTATGCGTCTACTTATAGTATTAGTCGTTGAACCTAGTACCTAATAATTCTGCTTG | 490    |
|       |        |                                                              |        |
| Sbjct | 159806 | GCTCGTATGCGTCTACTTATAGTATTAGTCGTTGAACCTAGTACCTAATAATTCTGCTTG | 159747 |
| Query | 491    | AATTATATCATAGACTGACATACCTCATGTAAGCCCTTCCTCCTCCTTCGGCGTCGAATA | 550    |
|       |        |                                                              |        |
| kojT3 | 159746 | AATTATATCATAGACTGACATACCTCATGTAAGCCCTTCCTCCTCCTTCGGCGTCGAATA | 159687 |
| Query | 551    | AGGATTTTCGAAGCCATTCAGCGGCT                                   | 576    |
|       |        |                                                              |        |
| Sbjct | 159686 | AGGATTTTCGAAGCCATTCAGCGGCT                                   | 159661 |

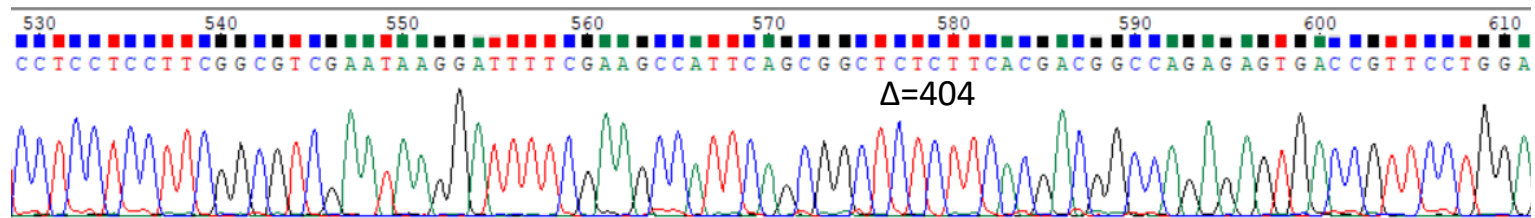

|       |        |                                                               |        |
|-------|--------|---------------------------------------------------------------|--------|
| kojT3 | 578    | TCTTCACGACGGCCAGAGAGTGACCGTTCCTGGAGTCAATCTCCGCCGCGCCTCCGAAAT  | 637    |
|       |        |                                                               |        |
| Sbjct | 159257 | TCTTCACGACGGCCAGAGAGTGACCGTTCCTGGAGTCAATCTCCGCCGCGCCTCCGAAAT  | 159198 |
| kojT3 | 638    | CTGTGAGCGCGTCAATACTAAAACACTTTTCATTGTCGGGTTCGATGGCCCGGACGACCA  | 697    |
|       |        |                                                               |        |
| Sbjct | 159197 | CTGTGAGCGCGTCAATACTAAAACACTTTTCATTGTCGGGTTCGATGGCCCGGACGACCA  | 159138 |
| kojT3 | 698    | GCTCAATCCCAAAAACCTGGTCTATAGGGCGGAAATGGGCGACATTGGGCATTGTAGGCAC | 757    |
|       |        |                                                               |        |
| Sbjct | 159137 | GCTCAATCCCAAAAACCTGGTCTATAGGGCGGAAATGGGCGACATTGGGCATTGTAGGCAC | 159078 |

**159661-159257=404 deleted in kojT3**

Figure S3. Sequencing chromatogram showing the breakpoint and sequence alignment for identifying a large deletion that disrupted the suggested motif in the *kojT* promoter and extended to the *kojT*-coding region in a KA-producing *A. flavus* mutant.

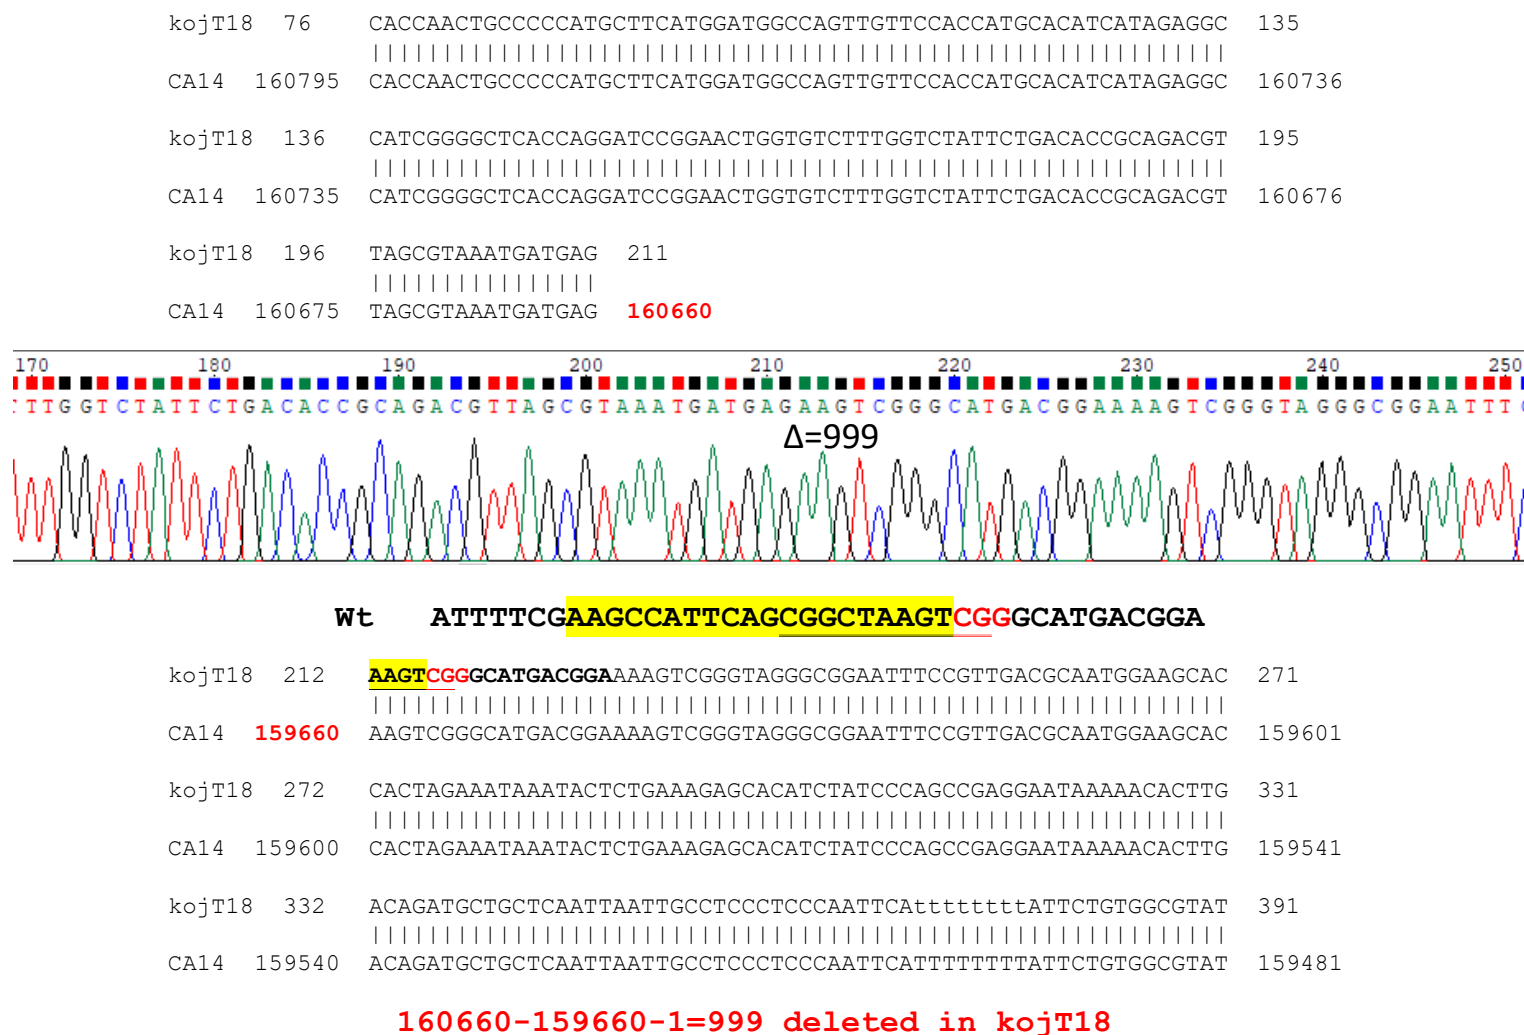

Figure S4. Sequencing chromatogram showing the breakpoint and sequence alignment for identifying a large deletion that disrupted the suggested motif in the *kojT* promoter and extended to the upstream *kojR*-coding region in an *A. flavus* mutant that was unable to produce KA.

Table S1. Primers used in vector construction, qRT-PCR, and sequencing

| Primer name | Sequence (5'→3')                                   | Use                  |
|-------------|----------------------------------------------------|----------------------|
| 5kojR-Sac   | CGAGTTGCTTTAGACCGAGG                               | Disruption           |
| 5kojR-B     | CTAATTCGGGATCCCGTTATCC                             | Disruption           |
| 3kojR-Xho   | AATCTCG AGAGTCAAAGACGGTTATTC                       | Disruption           |
| 3kojR-Sp    | GTTGAACCTTGTTCCGGTCAGC                             | Disruption           |
| kojR-OE     | ACTATAGCGGCCGCATGTCGTTGAATACCGACGATTCC             | Expression, PCR      |
| kojR-STOP   | TCCTGCATTATCTATATCTC                               | Expression           |
| GPI-H       | ATAAAGCTTCGCACTGTACGTAGTAGTA                       | Promoter swapping    |
| GPI-Not     | TATAGTGCGGCCGCTGTTATGTGATTTCTTCTAATGGAGA           | Promoter swapping    |
| kojA -qF    | CCGTATCATCCACACCGAGG                               | qRT-PCR              |
| kojA -qR    | AACCGGAAGAGCATCTGCAA                               | qRT-PCR              |
| kojR-qF     | AATACCGACGATTCCGGTCG                               | qRT-PCR, copy number |
| kojR-qR     | TTTCCTCTTGCGCAGTTTGC                               | qRT-PCR, copy number |
| kojT -qF    | GGCCAAAGCACGCATATCAG                               | qRT-PCR              |
| kojT -qR    | CGAACAGGAAAATAGCGCG                                | qRT-PCR              |
| 18S-F       | TTCCTAGCGAGCCCAACCT                                | qRT-PCR              |
| 18S-R       | CCCGCCGAAGCAACTAAG                                 | qRT-PCR              |
| U6-F-P      | ATACTGCAGTTCTCTTTAGAATTCAACTGTGGGT                 | CRISPR               |
| U6-R-K      | TATGGTACCACATATTTAAAAAAGTCTCCTGCC                  | CRISPR               |
| kojA_F      | GGTGAATGAGCGGCAAAGTGTTTTAGAGCTAGAAATAGCAAGTTAA     | CRISPR               |
| kojA_R      | ACTTTGCCGCTCATTCCACCCTTGTTCTTCTTTACAATGATTTATATACC | CRISPR               |
| kojT_F      | AAGCCATTCAGCGGCTAAGTGTTTTAGAGCTAGAAATAGCAAGTTAA    | CRISPR               |
| kojT_R      | ACTTAGCCGCTGAATGGCTTCTTGTTCTTCTTTACAATGATTTATATACC | CRISPR               |
| kojA-Fck    | GATCAACCGCAGTACACTCA                               | PCR, Sequencing      |
| kojA-CkR    | TCGTATCGCAAGCAGTAAGT                               | PCR, Sequencing      |
| kojT-Fck    | CGCTCGCCTTGGTGGCATGT                               | PCR, Sequencing      |
| kojT-CkR    | TCACAGTGGAGTCGATGGAG                               | PCR, Sequencing      |
| kojR1500    | TGCCAGATGGCATGATCCTG                               | PCR, Sequencing      |
| kojR1650    | GATCTCAAAGACTACTCTCCT                              | PCR, Sequencing      |

Table S2. Sequences of the *kojA* and *kojT* promoter regions used for the identification of KojR DNA-binding motif by MEME

|                               |                                                                                                                                                                                                                                                                                                                                                                                                          |
|-------------------------------|----------------------------------------------------------------------------------------------------------------------------------------------------------------------------------------------------------------------------------------------------------------------------------------------------------------------------------------------------------------------------------------------------------|
| <i>A_aflatoxiformans_kojA</i> | TATGAAGAGGCAGGTAGTTATAGTCTAGAGATGGTTATGTTCCGGTTCAAGAATCTTGAGAAGAAATGATTGTTGAAGTGTAGAGGCATACCC<br>CCAAAGGATCTCCATCGCTTTATATCCTTCCCTTCAGCAAGATAGCTTGACTCACTCCCATGGGCATGTCAAAAATGGTCCCTCCCTGATT<br>GTAACCCAACCTTGCCGGATAACGACACATGCACCCTGAAGCCAATTGCATCCAATGTGATACGAACGGATGAGGTGGAATGAGCGGCAAA<br>GTCGGGATAGATGATTGTGCGACGACTCTAGAAGATCGTAACATACTGAATGAGCGTTTAAATGCATGTGACGCGTTGATAATGTCACATCCG<br>CGGCGATG |
| <i>A_alliaceus_kojA</i>       | TTTGGAGAGACAAGTTATTGTAGTTCAAAGATGATATGTGTTCAAGTAAAGGATTAGAGGACTGGTTTCTGAAGAGAAGAGGACCAATGCA<br>GAAGAGGTCCCTTCGACTTATATCCTTTCCCTCAGTGTGCTATCCTGACTTACGGTGGTGGGTCGTGTCAAGGATGTTCTTCTCATCATTGTA<br>ACCTAAACATTTGTTGATAGTGATGTATGCATCCTGAAATCGGCCGTGTCCAATACGAGAAGAACGGATGAGGTGGAATGAGCGGCAAAAGT<br>CGGGAAGATGATTGTGCGACAACCTATAGATGAGGGTTAAACACCTCTCGAGCGTCTTGTGCATGTGACGACTTGATAATGTCACATCCAC<br>GGTGATTC  |
| <i>A_arachidicola_kojA</i>    | TATGAAGAGGGAGGTAGTTATAGTCTAGAGATGATTATGTTCAAGTAAAGGATTAGAGGACTGGTTTCTGAAGAGAAGAGGACCAATGCA<br>CCCAAGGATTTCCATCCCCTTTATATCCTTCCCTTCAGCAAGACAGCTTGACTCACTCCCATGGGCGTGTCAAGGATGCTCTTTTCCCTGATT<br>GTAACCCAACCTTGCCGGATAACGACACATGCACCCTGAAGCCAATTGCATCCAATGTGATACGAACGGATGAGGTGGAATGAGCGGCAAA<br>GTCGGGATAGATGATTGTGCGACGACTCTAGAAGACCGTAACATACTGAATGAGCTTTTAAATGCATGTGACGCGTTGATAATGTCACATCCG<br>CGGCGATG  |
| <i>A_bertholletius_kojA</i>   | GATGAAGAGACAAGTAGTTTTAGATGAGAGATGAGTGTGTTCCGGTTCAAGAATTTTGAGAAGGCTGGCTCGTGAAGTGTAGAAGATAGCC<br>CCCACGGCGTCCCCATCGCTTTATATCCTTCTATCCGCCGTGATTGTTTGAGTCACTCCTGTGGGCATATCAAGGATGCTCAATCCCTGAT<br>TGTAACGCAACATTCCCAAACCATGACACATGCACCGCGAAACCAATCGCATCCAACGCGATACGAACGGATGAGGTGGAATGAGCGGCAA<br>AGTCGGGATAGATGATTGTGCGGCGACTGTAGAGGATGGCAACATACTGAATGAGCTCTTAAATGCATGTGACGCGTTGATAATGTCACATCT<br>GCGACGACG  |
| <i>A_burnettii_kojA</i>       | TTTGGAGAGACAAGTTATTGTAGTTCAAGAGACGATATGTGTTCAAGTAAAGGATTAGAGGACTGGTTTCTGAAGAGAAGAGGACCAATGCA<br>GAAGAGGTCCCTTCGACTTATATCCTTTTCCCTCAGTGTGCTATCCTGACTTACGGTGGTGGGTCGTGTCAAGGATGTTCTTCTCATCATTGT<br>AACCTAAACATTCGTTGATAGTGATGTATGCATCCTGAAATCGGCCGTGTCCAATACGAGAAGAACGGATGAGGTGGAATGAGCGGCAAAAG<br>TCGGGAAGATGATTGTGCGACAACCTATAGATGAGGGTTAAACACCTCTCGAGCGTCTTGTGCATGTGACGACTTGATAATGTCACATCCA<br>CGGTGATT |
| <i>A_caelatus_kojA</i>        | ATGAATAGGCAGGTAGTTATAGTCTAGAGATGATTATGTTCCGGTTCAAGAGTCTTGAGAAGAATGGTTGTTGAAGTGTAGAGGAATAGCCC<br>CCCAAGGATTTCCGTCGCTTTATATCCTTCCCTTCAGCAGGATAGCTTGAGTCACTCCTATGAGCATGTCAAGGATTCTCCTTCCCTGATT<br>GTAACCCAACACACCCGGATAACGACACATGCACTCTGAAGCCAATCGCATCCAATGTGATACGAACGGATGAGGTGGAATGAGCGGCAAA<br>GTCGGGATAGATGATTGTGCGACGACTCTAGAAGATCGCAACATACTCACTGAGCTTTTAAATGCATGTGACGCGATTGATAATGTCACATCCG<br>CGGTGAT  |
| <i>A_coremiiformis_kojA</i>   | GTCAAAGTGAATTACGAAGTAGTTCTAATCTGGAGTTGATTCCGGTTCCGTTCAAGAAGCTCGCAAGAAGTGGAAGTTGACGAAAAGAGAAA<br>CAGTTCGGAAGAGGTTTCATCCCCTTATATTGCTTTCCCTCCGTGTCGATCTGGACTCACTCTGGTGGGCCATAGCTAGGATTTTCTTCTCC<br>TGATTGTAACCCAAGATTCCAAGATAGCGACGGATGCATGCTGACACCAATGGCAACCAAGGCAATACGAACGGGTCAGGTGGAATGAGCG<br>GCAAAGTCGGGACCGATGATTGTGCGACGACTATAGATGATTCTCAAATGCTTGAGTTGTACTGCTAACAATG                                 |
| <i>A_flavus_kojA</i>          | TATGAAGAGGCAGGTAGTTATAGTCTAGAGATGGTTATGTTCCGGTTCAAGAATCTTGAGAAGAAATGATTGTTGAAGTGTAGAGGCATACCC<br>CCAAAGGATCTCCATCGCTTTATATCCTTCCCTTCAGCAAGATAGCTTGACTCACTCCCATGGGCATGTCAAAAATGGTCCCTCCCTGATT<br>GTAACCCAACCTTGCCGGATAACGACACATGCACCCTGAAGCCAATTGCATCCAATGTGATACGAACGGATGAGGTGGAATGAGCGGCAAA<br>GTCGGGATAGATGATTGTGCGACGACTCTAGAAGATCGTAACATACTGAATGAGCGTTTAAATGCATGTGACGCGTTGATAATGTCACATCCG<br>CGGCGAT  |
| <i>A_hancockii_kojA</i>       | TTTGAAGAGACAAGTAATAGTGAATATTATAGTGATTGCCGTAGTCGTCTATAGATAACAATCAATTCTTAGGAACTTGAAGAGGCTGGT<br>GGTTTGAAAATGAGAAGCGCCCTAGGGACTCAATCGCTTTATATCCTTTTCTTCAGCGTCGTATCTTGACTCCACAGGTGGATCATGTC<br>AAGGGTCTCCCTCCCATGATTGCAACCCAACATTGCAAGATAGCGACATACGCATCCTGAAACGAATCGCATCCAATGCGATACGAACGGA<br>AGAGGTGGAATGAGCGGCAAAGTCGGGATAGACCATCTTCGATGACAAGAGAAGATCATTAACAGCTGTTGAGTTCTCTCATGCATGTCAG<br>CTTTTGATAATGTC  |

|                                 |                                                                                                                                                                                                                                                                                                                                                                                                        |
|---------------------------------|--------------------------------------------------------------------------------------------------------------------------------------------------------------------------------------------------------------------------------------------------------------------------------------------------------------------------------------------------------------------------------------------------------|
| <i>A_leporis_kojA</i>           | CTTGAAGAAACAAGTAGTAGTAAAGTGGTAGTCGTAGTAGTCCAGAGGTGATACTCTAAGAAGCTCAACGAGGCTGGTGTGTTGAAGAAAT<br>GAGAAGCTTCCCACCAAGGACTCGTTGACCTTATATCCCTTTCTTCAGTGTCTGAGCTTGACTCTCCTCGATGGGACATGTCAAGGATCTT<br>CTTCCTATGATTGCAACCTAACATCCGAATATAGCGACATACATCCTAAAACTAGCAGTATCCAATGCGAGACGAACGGAAGAGGTGGA<br>ATGAGCGGCAAAGTCGGGATGGAGCGTTTTTCGATGATAATGGAAGATCATAAAGCAGGTGTTGAGCTCCTCATGCGTGTGAGCTTTTGATA<br>ATGTCACATC  |
| <i>A_luteovirescens_kojA</i>    | TATGAAGAGGCGGGTAGTTATAGTCTAGAGATGATTGTGTTTGGTTCTAAAGCTTGAGAAAAGTGGTTGTTGAAGTAGGTAGGAATAGCCC<br>CCAAGGCTTCCCATAGCTTTATATCCTTCTCGCCAGCAGGGTAGCTTGACTCACTTCCGTGGCCATGTCAAGGGTGCTCTTTCCATGATTG<br>TAACCCAACATTCCCCGATAGCGACACATGCACTCTGAAGCCAATCGCATTCAATGTGATACGAACGGATGAGGTGGAATGAGCGGCAAAG<br>TCGGGATAGATGATTGTGACGACTCCAGAAGATCGTAACATACTTGAATGAGTTTTTGATGCATGTGAGCGCTTGATAATGTCACATCCG<br>CGGCGAT     |
| <i>A_minisclerotigenes_kojA</i> | TATGAAGAGGCAGGTAGTTATAGTCTAGAGATGGTTATGTTTCGGTTCAAGAATCTTGAGAAGAATGATTGTTGAAGTGTAGAGGCATACCC<br>CCCAAGGATCTCCATCGCTTTATATCCTTCCCTTCAGCAAGATAGCTTGACTCACTCCCATGGGCATGTCAAGGATGGTCTTCCCTGATT<br>GTAACCCAACCTTTGCCGGATAACGACACATGCACCCTGAAGCCAATTGCATCCAATGTGATACGAACGGATGAGGTGGAATGAGCGGCAA<br>AGTCGGGATAGATGATTGTGACGACTCTAGAAGATCGTAACATACTGAATGAGCGTTTAAATGCATGTGAGCGCTTGATAATGTCACATCC<br>GCGGCGAT   |
| <i>A_nomiae_kojA</i>            | TATGAAGAGGCAGGTAGTTATAGTCTAAAGATGATTCTGTTCGGTTCAAAAGACTTGAGAAAGGTGGTTGTTGAAGTAGGGAGGAATAGCC<br>CCCAAGGCTTCCATCGCTTTATATCCTTCCCCAGCAGGATGGCTTGACTCACTCCGGTGGCCATGTCAAGGGTGCTCTTTCCCTGATTG<br>TAACCCAACATTCCCAGATAACGACATATGCATCCTGAAGCCAATCGCATCCAATGTGATACGAACGGATGAGGTGGAATGAGCGGCAAAG<br>TCGGGATAGATGATTGTGACGACTCCAGAAGATCGTAACATACTTGAATGAGTTTTTGATGCATGTGAGCGCTCGATAATGTCACATCCG<br>CGGCGA        |
| <i>A_novoparasiticus</i>        | TATGAAGAGGCAGGTAGTTATAGTCTAGAGATGATTATGTTTCGGTTCAAGAATCTTGAGAAGAATGGTTGTTGAAATGTAGAGGCATACTC<br>CCCAAGGATTTCCATCCCTTTATATCCTTCCCTTCAGCAAGACAGCTTGACTCACTGCCATGGGCATGCCAAGGATGCTCTTTTCCCTGAT<br>TGTAACCCAACCTTGCCGGATAACGACACATGCACCCTGAAGCCAATTGCATCCAATGTGATACCAACGGATGAGGTGGAATGAGCGGCAA<br>AGTCGGGATAGATCACTGTGACGACTCTAGAAGATTGTAACATACTGAATGAGCTTTTAAATGCATGTGAGCGCTTGATAATGTCACATCC<br>GCGGCGATG |
| <i>A_oryzae_kojA</i>            | TATGAAGAGGCAGGTAGTTATAGTCTAGAGATGGTTATGTTTCGGTTCAAGAATCTTGAGAAGAATGATTGTTGAAGTGTAGAGGCATACCC<br>CCAAAGGATCTCCATCGCTTTATATCCTTCCCTTCAGCAAGATAGCTTGACTCACTCCCATGGGCATGTCAAAAATGGTCTTCCCTGATT<br>GTAACCCAACCTTGCCGGATAACGACACATGCACCCTGAAGCCAATTGCATCCAATGTGATACGAACGGATGAGGTGGAATGAGCGGCAAA<br>GTCGGGATAGATGATTGTGACGACTCTAGAAGATCGTAACATACTGAATGAGCGTTTAAATGCATGTGAGCGCTTGATAATGTCACATCCG<br>CGGCGAT    |
| <i>A_parasiticus_kojA</i>       | TATGAAGAGGCAGGTAGTTATAGTCTAGAGATGATTATGTTTCGGTTCAAGAATCCTGAGAAGAATGGTTGTTGAAATGTAGAGGCATACTC<br>CCCAAGGATTTCCATCCCTTTATATCCTTCCCTTCAGCAAGTCAGCTTGACTCACTCCCATGGGCATGTCAAGGATGCTCTTTTCCCTGATT<br>GTAACCCAACCTTGCCGGATAACGACACATGCACCCTGAAGCCAATTGCATCCAATGTGATACGAACGGATGAGGTGGAATGAGCGGCAAA<br>GTCGGGATAGATGATTGTGACGACTCTAGAAGATTGTAACATACTGAATGAGCTTTTAAATGCATGTGAGCGCTTGATAATGTCACATCCG<br>CGGCGAT  |
| <i>A_pseudocaelatus_kojA</i>    | TATGAATAGGCAGGTAGTTATAGTCTAGAGATGATTATGTTTCGGTTCAAGAGTCTTGAGAAGAATGGTTGTTGAAGTGTAGAGGAATAGCC<br>CCCAAGGATTTCCGTCGCTTTATATCCTTCCCTTCAGCAGGATAGCTTGAGTCACTCCTATGAGCATGTCAAGGATTCTCCTTCCCTGAT<br>TGTAACCCAACATACCCGGATAACGACACATGCACTCTGAAGCCAATCGCATCCAATGTGATACGAACGGATGAGGTGGAATGAGCGGCAA<br>AGTCGGGATAGATGATTGTGACGACTCTAGAAGATCGCAACATACTCACTGAGCTTTTAAATGCATGTGAGCGATTGATAATGTCACATCC<br>GCGGTGAT   |
| <i>A_pseudonomius_kojA</i>      | TTTGAAGAGGCAGGTAGTTATAGTCTGAAGATGATTCTGTTCGGTTCAAAAGACTTGAGAAAGGTGGTTGTTGAAGTAGGGAGGAATAGCC<br>CCCAAGGCTTCCCATCGCTTTATATCCTTCTCCGAGCAGGATAGCTTGACTCACTCCGGTGGCCATGTCAAGGGTGCTCTTTCCCTGATT<br>GTAACCCAACATTCCCAGATAACGACATATGCACCCTGAAGCCAATCGCATCCAATGTGATACGAACGGATGAGGTGGAATGAGCGGCAAA<br>GTCGGGATAGATGATTGTGACGACTCCAGAAGATCGTAACATACTTGGATGAGCTTCTGATGCATGTGAGCGCTTGATAATGTCACATCC<br>GCGGCG       |

|                                |                                                                                                                                                                                                                                                                                                                                                                                                                             |
|--------------------------------|-----------------------------------------------------------------------------------------------------------------------------------------------------------------------------------------------------------------------------------------------------------------------------------------------------------------------------------------------------------------------------------------------------------------------------|
| <i>A_pseudotamarii_kojA</i>    | TATGAATAGACAGGTAGTTATAGTTTAGAGATGATTATGTTTCGGTTCAGGAATCTTGAGAAGAATGGTTATTGAAGTGTAGAGGAATAGCC<br>CCCCAAGGATTTCCGTCCCTTTATATCCTTCCCTTCAGCAGGATGGTTTGAGTCACTCCCATGAGCATGTCAAGGATTCTCTTTCCCTGAT<br>TGTAACCCAACATATCCGGATAACGACACATGCACCTCTGAAGCCAATCGCATCCAATGTGATATGAACGGATGAGGTGGAATGAGCGGCAA<br>AGTCGGGATAGATGATGTTTCGACGACTCTAGAAGATCGTAACATACTCACTGAGCTTTTAATGCATGTCAGCGATTGATAATGTCACATCC<br>GCGGTGA                      |
| <i>A_sergii_kojA</i>           | TATGAAGAGGCAGGTAGTTATAGTCTAGAGATGATTATGTTTCGGTTCAGAATCTTGAGAAGAATGGTTGTTGAAATGTAGAAGCATACTC<br>CCCCAAGGATTTCCATCTCTTTATATCCTTCCCTTCAGCAAGGCAGCTTGACTCACTCCCATGGGCATGTCAAGGATGCTCTTTTCCTGATT<br>GTAACCCAACCTTGCCGGATAACGACACATGCACCCTGAAGCCAATTGCATCCAATGTGATACGAACGGATGAGGTGGAATGAGCGGCAAA<br>GTCGGGATGGATGATTGTTCGACGACTCTAGAAGATTGTAACATACTGGATGAGCTTTTAATGCATGTCAGCGATTGATAATGTCACATCCG<br>CGGCGAT                       |
| <i>A_sojae_kojA</i>            | TATGAAGAGGCAGGTAGTTATAGTCTAGAGATGATTATGTTTCGGTTCAGAATCTTGAGAAGAATGGTTGTTGAAATGTAGAGGCATACTC<br>CCCCAAGGATTTCCATCCCTTTATATCCTTCCCTTCAGCAAGTCAGCTTGACTCACTCCCATGGGCATGTCAAGGATGCTCTTTTCCTGATT<br>GTAACCCAACCTTGCCGGATAACGACACATGCACCCTGAAGCCAATTGCATCCAATGTGATACGAACGGATGAGGTGGAATGAGCGGCAAA<br>GTCGGGATAGATGATTGTTCGACGACTCTAGAAGATTGTAACATACTGAATGAGCTTTTAATGCATGTCAGCGCTTGATAATGTCACATCCG<br>CGGCGATG                      |
| <i>A_tamarii_kojA</i>          | TATGAATAGGCAGGTAGTTATAATCTAGAGATTATTATATTTTGTTCAGAATCTTGAAAAGAATGGTTGTTGAAGTCTAGAGGAATAGCC<br>CCCCAAGGATTTCCGGCGCTTTATATCCTTCCCTTTAGCAGGATAGTTTGAGTCACTCCCATGAGCATGTCTAGGATTCTCTTTCCCTGAT<br>TGTAACCCAACATATCCGGATAACGACACCTGCACCTCTGAAGCCAATCGCATCCAATGTGATACGAACGGATGAGGTGGAATGAGCGGCAA<br>AGTCGGGATAGATGATTGTTCGACGACTCTAGAAGATCGCAACATACTCACTGAGCTTTTAATGCATGTCAGCGATTGATAATGTCACATCC<br>GCGGTGAT                       |
| <i>A_transmontanensis_kojA</i> | TATGAAGAGGCAGGTAGTTATAGTCTAGAGATGATTATGTTTCGGTTCAGAATCTTGAGAAGAATGGTTGTTGAAATGTAGAGGCATACTC<br>CCCCAAGGATTTCCATCCCTTTATATCCTTCCCTTCAGCAAGACAGCTTGACTCACTCCCATGGGCATGTCAAGGATGCTCTTTTCCTGATT<br>GTAACCCAACCTTGCCGGATAACGACACATGCACCCTGAAGCCAATTGCATCCAATGTGATACGAACGGATGAGGTGGAATGAGCGGCAAA<br>GTCGGGATAGATGATTGTTCGACGACTCTAGAAGATTGTAACATACTGAATGAGTTTAAATGCATGTCAGCGCTTGATAATGTCACATCCG<br>CGGCGAT                        |
| <i>A_alliaceus_kojT</i>        | TACAGAAATGTCAAGACTGATTGTATGATGGAACAGTGTCCGCACGCATCTACTTATAGTGTTAGACAAATATTGTAATACCTAATTATTT<br>CTACTTAAATTACACTATGAGCTGGGATAACATCTGTATGTTCTTTGACTTTCCCTGGTTCCGAATGAGAAATTTGAAAGCCATTGAGCGG<br>CTATGTTCGGACGCGACGGGAAAGTCGGATAGGGCGGAATTCGGGGTTGACGCAACGACAGCACCCTGGAATAAAATACTCCCGGAAAGAA<br>TAACTATTCTAGCCAGTGAAAGAGAACATTTCAGACAAATGTTGCTCGAATAATTGTGTCTCTCCAAGAAAACACTTCCTCGTTCTGCTCAG<br>TTTCTCCGCGCTTCGCAATT           |
| <i>A_arachidicola_kojT</i>     | TGCAGGAAATTGAGGATTATTTACACGATCAGAAAGTGCTAGTATGCGTCTACTTATAGTATTAGTCAATGAACCTGGTGCCTAATAATTC<br>AAGGAAAATTCTATCATAGACTCACATACCTCTGTAAGCCCTTCCTCGTCCTTCGGCGCCGAATAAGGATTTTCGAAGCCACTCGGCGCT<br>AAGTCGGGCATGACGGAAAAGTCGGGTAGGGCGGAATTCGGTTGACGCAATGGAAGCACCGCTAGAAATAAATACTCTGAAGAGAGCACA<br>TTTGTTCTAGGCGAGGAGTAAAAACATTTGACAGATGCTGCTCAGTTAATTGCCTTCCTTCCAATTTTCATATTTATTCTGCGGCGTATGTC<br>TTGAACGCCTCGCAACG                |
| <i>A_bertholletius_kojT</i>    | TGTAGGAAATGAGAACTATCTACAGGGCTCAAAGTGCTTGCCCTGCGTCTTCTTATAGTCTTAGTCAATGGACCTAACACCCCATAAATCT<br>GCATAGATTCGACTATAGACTAGCATAGCTCTGGTACACTCTTCCTCGTCCTTAGGTTTCGAGCTGAATAAGGATAGTCAAGCCATTGAGC<br>GGCTAAGTCGGGCATGACGGAAAGGTCGGTTAGGGCGGAATTATGGATTGACGCAATAGAAGCAGCATGAGAAATAAATACTGCTGAAACGA<br>GCTCAATGATTGAGCTGAGGAGTAACCACATCTACCAGATGTTGCTTAATTGATATTTTGTCTTCCGTTTCCTATTTTTCCTTTTCACTGT<br>CCGTAGTGTGTGCTTGAGCGTCTCAGAACG |
| <i>A_burnettii_kojT</i>        | TACAGAAATGTCAAGACTGATTGTATGATCGAACAGTGTCCGCACGCATCTACTTATAGTGTTAGACAAATATTGTAATACCTAATTATTT<br>CTACTTAAATTACACTATGAGCTGGGATAACATCTGTATGTTCTTTGACTTTCCCTGGTTCCGAATGAGAAATTTGAAAGCCATTGAGCGG<br>CTATGTTCGGACGCGACGGGAAAGTCGGATAGGGCGGAATTCGGGGTTGACGCAACGACAGCACCCTGGAATAAATACTCCCGGAAAGAA<br>TAACTATTCTAGCCAGTGGAAGAGAACATTTCAGACAAATGTTGCTCGAATAATTGTGTCTCTCCAAGAAAACACTTCCTCGTTCTGCTCAG<br>TTTCTCCGCGCTTCGCAATT            |



|                                 |                                                                                                                                                                                                                                                                                                                                                                                                                   |
|---------------------------------|-------------------------------------------------------------------------------------------------------------------------------------------------------------------------------------------------------------------------------------------------------------------------------------------------------------------------------------------------------------------------------------------------------------------|
| <i>A_caelatus_kojT</i>          | TGCAGAAAATTGAGGACTAATTACACGATCAGAAAGTGCTCGTATGCGTCTACTTATAGTATTAATCGATGAGCCTAGTACCTATTAATTC<br>TGCGTCCATTATATCATAGACTGACGTACCTCTTGTAAGCTCTTTCTCGCCCTTTGGCGCCGAATAAGGATTTTCGAAGCCATTACGCGGC<br>TAAGTCGGGCATGACGGGAAAAGTCGGTTAGGGCGGATTTCCGGTTGACGCAATGGAAGGAACACTAGAAATAAATACTCCGAAAAGAGCAC<br>ATTTATTCTTGCCGAGGAGTAAAAACATTTGACAGATGTTGTTTTAGTTTTAATATCTCTCTCCCAATTCCAATCTTTATTTTGTGGTGTGT<br>GTCTGAGCGCCCCGCAACG |
| <i>A_coremiiformis_kojT</i>     | AAGCATGTCCGTGTGGCTCTACTTATAGTATTAGTCCATGACTGTAGTGACTGATAATCTCTACATTGGTTTACACTACAGATTGGCATTCT<br>TTTGCTTTTGGTGTGCGTTATTTCGGTTCCAAACAAGAAATTTCCATGCCATTTGGCGGGTAAGTCGGGCATGACGGGTAGGGCGGGTAGGG<br>CGGACTGCGGGTTTGATGCACCGCTGGAAATAAATACTCCGAAAAGATCAATTAATCCAGTCAGTGTGTGAGAATATTGAGACATATGCTG<br>ATCGATTGATTGCCTCCTTCCAGCTCTTTTCTTTCTTTCTTTTGTGTTGTGTGTGTGTGCTGGAACACCTGGCAACA                                      |
| <i>A_flavus_kojT</i>            | TGCAGGAAATTGAGGACTATTTACACGATCAGAAAGTGCTCGTATGCGTCTACTTATAGTATTAGTCGTTGAACCTAGTACCTAATAATTC<br>TGCTTGAATTATATCATAGACTGACATACCTCATGTAAGCCCTTCTCTCCTTCGGCGTCAATAAGGATTTTCGAAGCCATTACGCGGC<br>TAAGTCGGGCATGACGGGAAAAGTCGGGTAGGGCGGAATTTCCGTTGACGCAATGGAAGCACCAGTAAATAAATACTCTGAAAGAGCAC<br>TCTATCCCAGCCGAGGAATAAAAAACACTTGACAGATGCTGCTCAATTAATTGCCTCCCTCCCAATTCATTTTTTTTTATTCTGTGGCGTATG<br>TCTTGAACGCCTCGCAACG      |
| <i>A_hancockii_kojT</i>         | TACCAGTTAAGAGGATTGAGGAGTGTCTGTATGCGTCTACTTATAGTCTTATACAATCAATGCAGTAAATAATCATATCTACCTTGGTTAC<br>ACTATAGACTGGCATTATTATCCGTATGTTCTTTTCTCTCTGTTCCGAACGAGAATTTTCGAAGTCATCCAGCGGTTAAGTCGGACGC<br>AGCGGAAAAGTCGGGTAGGGCGGAATCCCGCTTTGACGCAATAGAAGCACCACGAGTGGAATAAATACTCCTGTAATTTGCAATATTG<br>CACACAGTGAGTAAGGACCCCAAACAGATGTTGCTCCATTGATCCGGTCTGTTCTGTTTCTTTTCGCAATCGCGGTGCGGATAC<br>AACC                               |
| <i>A_leporis_kojT</i>           | TACAGGAATGATGGCTACTGAAGAGTGTCCGTATGTGTCTACTTATAGTACTAGGCAATGAATGTAGTGGGTAAGCAATTCTACTTGGGTT<br>ACACTATAGACTGGCATGACTTTGTATGTTGTTTTTCTCTAGTTCCGAACAAGAAATTTTCGATGTCAATCAACGGCTAAGTCGGACACA<br>GCGGAAAAGTCGGGTAAGGCGGAATTCAGCTTTGACGCAATAGTAGCACGAGTGGAATAAATACTCCGGCGATTGCAATATTGACACAG<br>GTGAGTAAAGATCGCAGACAAACATTGTTGCTCAATTGATAGTGCTGTCATTCTATAAAATTTTTTTTTTCTTTTCTTCCCTATAT<br>TTGGTCGCGGTACAACC             |
| <i>A_luteovirescens_kojT</i>    | TGCAGGAAATGAGGACTATTTACACCACCAGGAAGTGCTCGTATGCGTCTACTTATAGTATTAGTTAATGGACCTAGGACTTAATAAATCT<br>GTTTGGATTATATCATAGACAGACATACCTCTTGTAAACTGTTCCCTTGCCCTTTGGCGCCGAATAAGGATTTTCGGAGCTATTACGCGGTT<br>AAGTCGGGCATGACGGGAAAAGTCGGTTAGGGCGGAATTCGGGTTGACGCAATGGAAGCACCACCAGAAATAAATACTCTGAAAGAGCACAT<br>TTGTTCTAGCCGAGGAGTAAAAACGTTTGACAGATGTTGCTTAATTGACTGCCTTCTCCCAATTCCTTTTTGTATTTTCTGGGTTGTGTCT<br>CTGATCGCCTCGCAACG   |
| <i>A_minisclerotigenes_kojT</i> | TGCAGGAAATTGAGGACTATTTACACGATCAGAAAGTGCTCGTATGCGTCTACTTATAGCATTAGTCATTGAACCTAGTACCTAGTAATTC<br>TGCTTGAATTATATCATAGACTGACATACCTCTTGTAAGCCCTTCTCCTCCTTCGGCGCCGAATAAGGATTTTCGAAGCCATTACGCGGC<br>TAAGTCGGGCATGACGGGAAAAGTCGGGTAGGGCGGAATTTCCGTTGACGCAATGGAAGCACCAGTAAATAAATACTCTGAAAGAGCAC<br>TCTATCCTAGCCGAGGAATAGAAACATTTGACAGATGCTGTTCAATTAATTGCCTTCCTCCCAATTCATTTTTTTTTATTCTGTGGCGTATG<br>TCTTGAACGCCTCGCAACG     |
| <i>A_nomiae_kojT</i>            | TGCAGGAAATGAGGACTATTTACAGAACCCGACAGTGCTCGTATGCGTCTACTTATAGTATTAGTTAATAGAGCTAGGACTTAATCATTCT<br>GTTTGGATTATATCATAGACGAACATACCTCTTCTAAGCTCCTCCTGTTCTTTGGTGCCGAAAAACGGTTTTTCGAAGCCATTACGCGGCT<br>AAGTCGGGCATGACGGGAAAAGTCGGTTAGGGCGGAGTTCCGGTTGACGCAATGGAAGCACCAGTAAATAAATACTCTGAAAGAGCAC<br>TTTAGTCTAGCCGAGGAGTGAAAACATTTGAGCAGATGTCGCTTGATTGATTCTTTCTCCTAATTTCTTTTTTATTGTTGGTGTGTGTCT<br>TTGAGCGCCTCGCAACG         |
| <i>A_novoparasiticus_kojT</i>   | TGCAGGAAATTGAGGATTATTTACACGATCAGCAAGTGCTAGTATGCGTCTACTTATAGTATTAGTCAATGAACCTGGTACCTAATAATTC<br>AAGGAGAATTATATCATAGACTCACATACCTCTTGTAACCCTTCTCGTCTTTCGGCGCCGAATACGGATTTTCGAAGCCATTACGCGGC<br>TAAGTCGGGCTTGACGGGAAAAGTCGGGTAGGGCGGAATTCGCGTTGACGCAATGGAAGCACCAGTAAATAAATACTCTGAAAGAGCAC<br>ATTTATTCTAGCCGAGGAGTAAAAACATTTGACAGATGCTGCTTAGTTAATTGCCTCCCTCCCAATTCCTTTTTTTTTATTCTGCGCGTATGT<br>CTTGAACGCCTCGCAACG      |
| <i>A_oryzae_kojT</i>            | TGCAGGAAATTGAGGACTATTTACACGATCAGAAAGTGCTCGTATGCGTCTACTTATAGTATTAGTCGTTGAACCTAGTACCTAATAATTC<br>TGCTTGAATTATATCATAGACTGACATACCTCATGTAAGTCCTTCTCCTCCTTCGGCGCCGAATAAGGATTTTCGAAGCCATTACGCGGC                                                                                                                                                                                                                         |

|                                |                                                                                                                                                                                                                                                                                                                                                                                                                     |
|--------------------------------|---------------------------------------------------------------------------------------------------------------------------------------------------------------------------------------------------------------------------------------------------------------------------------------------------------------------------------------------------------------------------------------------------------------------|
|                                | TAAGTCGGGCATGACGGAAAAGTCGGGTAGGGCGGAATTTCCGTTGACGCAATGGAAGCACCCTAGAAATAAACTACTCTGAAAGAGCACA<br>TCTATCCCAGCCGAGGAATAAAAACACTTGACAGATGCTGCTCAATTAATTGCCTCCCTCCCAATTCATTTTTTTTATTCTGTGGCGTATG<br>TCTTGAACGCCTCGCAACG                                                                                                                                                                                                   |
| <i>A_parasiticus_kojT</i>      | TGCAGGAAATTGAGGACTATTTACACGATCAGAAAGTGCTCTTATGGGTCTACTTATAGTATTAGTCAATGAACCTGGTACCTAATAATTC<br>AAAGAGAATCATAGCATAGACTCACATACCTCTTGTAAGCCCTCCCTCGTCCTTCAGCGCCGAATAAGGATTTTCGAAGCCATTAGCGGGC<br>TAAGTCGGGCATGACGGAAAAGTCGGGTAGGGCGGAATTTCCGTTGACGCAATGGAAGCACCATTAGAAATAAACTACTCTGAAAAGAGCAC<br>ATTTATTCTAGCCGAGGAGTAAAACATTTGACAGATGCTGCTCAGTTAATTGCCTCCCTCCCAATTCCTTTTTTTTATTCTGCGGCGTATGT<br>CTTGAACGCCTCGCAACG    |
| <i>A_pseudocaelatus_kojT</i>   | TGCAGAAAATTGAGGACTAATTACACGATCAGAAAGTGCTCGTATGCGTCTACTTATAGTATTAATCGATGAGCCTAGTACCTATTAATTC<br>TGCGTCCATTATATCATAGACTGACGTACCTCTTGTAAGCTCTTTCTCGCCCTTTGGCGCCGAATAAGGATTTTCGAAGCCATTAGCGGGC<br>TAAGTCGGGCATGACGGGAAAGTCGGTTAGGGCGGATTTCCGGTTGACGCAATGGAAGGAACACTAGAAATAAACTACTCCGAAAAGAGCAC<br>ATTTATTCTTGCCGAGGAGTAAAACATTTGACAGATGTTGTTTTGGTTGAATATCTCTCTCCCAATTCCAATTTTTATTGTGGTGTGT<br>GTCTGAGCGCCCCGCAACG       |
| <i>A_pseudonomius_kojT</i>     | TGCAGGAAATGAGGACTATTTACAGAACCAGAAAGTGCTCGTATGCGTCTACTTATAGTATTAGTTAATAGACCTAGGATTTAATCATTCT<br>GTTTGGATTATATCATAGACGAACATATCTCTTCTAAGCTCTTCCTTGTCCTTTGGTGCCGAATAGCGGTTTTTCGAAGCCATTAGCGGGC<br>AAGTCGGGCATGACGGGAAAGTCGGTTAGGGCGGAGTTCCGGTTGACGCAATGGAAGCACCCTAGAAATAAACTACTCTGAAAAGAGCACA<br>TTTAGTCTAGCCGAGTAGTGAACATTTGGCAGATGTCGCTTAATTGATTCCCTTCTCCCAATTCCTTTTTTTTTTATTGTGGTGTGT<br>GTCTTGAGCGCCTCGCAACG        |
| <i>A_pseudotamarii_kojT</i>    | TGCAGGAAATTGAGGACTATTTACACGATCAGAAAGGGCTCGTATGCGTCTACTTATAGTATTAGTCGATAGGCCCTAGTACCTAGTAATTC<br>TGCTTGCAATTATATCATAGACTGACGTACCTCTTGTAAGCTCTTTCTCGCCCTTTGGCGCTGAATAAGGATTTTCGAAGCCATTAGCGGGC<br>TAAGTCGGCCATGACGGGAAAGTCGGTTAAGGCGGATTTCCGGTTGACGCAATGGAAGGACCCTAGAAATAAACTAGTCCGAAAAGAGCAC<br>ATTTATTCTTGCCGAGGAGTAAAACATTTGACAGATGTTGCCTTAATTATCTCTCTCCCAATTCCTTTTATTATTTTGTGGTGTGTGTCT<br>TGAGCGCCTCGCAACG       |
| <i>A_sergii_kojT</i>           | TGCAGGAAATTGAGGATTATTTACACGATCAGAAAGTGCTAGTATGCGTCTACTTATAGTATTAGTCAATGAACCTGGTACCTAATAATTC<br>AAGGAGGATTATATCATACACTCACATACCTCTTGTAAGCCCTTCCTCGTCCTTCGGCGCCGAATAAGGATTTTCGAAGCCATTAGCGGGC<br>TAAGTCGGGCATGACGGAAAAGTCGGGTAGGGCGGAATTTTCGTTGACGCAATGGAAGCACCCTAGAAATAAACTACTCTGAAAAGAGCAC<br>ATTTATTCTAGCCGAGGAGTAAAACATTTGACAGATGCTGCTCAGTTAATTGCCTCGCTCCCAATTCCTTTTTTTTTTATTCTGCGGCGTATG<br>TCTTGAACGCCTCGCAACG   |
| <i>A_sojae_kojT</i>            | TGCAGGAAATTGAGGACTATTTACACGATCAGAAAGTGCTCTTATGGGTCTACTTATAGTATTAGTCAATGAACCTGGTACCTAATAATTC<br>AAGGAGGATTATATCATAGACTCACATACCTCTTGTAAGCCCTTCCTCGTCCTTCAGCGCCGAATAAGGATTTTCGAAGCCATTAGCGGGC<br>TAAGTCGGGCATGACGGAAAAGTCGGGTAGGGCGGAATTTCCGTTGACGCAATGGAAGCACCATTAGAAATAAACTACTCTGAAAAGAGCAC<br>ATTTATTCTAGCCGAGGAGTAAAACATTTGACAGATGCTGCTCAGTTAATTGCCTCCCTCCCAATTCCTTTTTTCTATTCTGCGGCGCATGT<br>CCTGAACGCCTCGCAACG    |
| <i>A_tamarii_kojT</i>          | CACAGGAAATTGAGGACTATTTACACGATCAGAAAGTGCTCGTATGCGTCTACTTATAGTATTAATCCATGAGCCTAGTATCTAGTAATTC<br>TGCTTGCAATTATATCATAGACTGACGTATCTCATGTAAGCTCTTTCTCGCCCTTTGGCGCCGAATAAGGATTTGCGAAGCCATTAGCGGGC<br>TAAGTCGGGCATGACGGGAAAGTCGGTTAGGGCGGATTTCCGCGTTGACGCAATCGAAGCACCCTAGAAATAAACTACTCCGAAAAGAGCAC<br>ATTTATTCTTGCCGAGGATTAAAGACATTTGACAAAGTGTTGCTTTAATTGATTGTCTTTCTCCCAATTAACTTTTGTATTTTGTGGCGTGT<br>GTCTTGAGCGCCTCGCAACG |
| <i>A_transmontanensis_kojT</i> | TGCAGGAAATTGAGGATTATTTACACGATCAGAAAGTGCTAGTATGCGTCTACTTATAGTATTAGTCAATGAACCTGGTACCAAATAATTC<br>AAAGAGAATTATAGCATAGACTCACATACCTCTTGTAAGCCCTTCCTCGTCCTTCAGCGCCGAATAAGGATTTTCGAAGCCATTAGCGGGC<br>TAAGTCGGGCATGACGGAAAAGTCGGGTAGGGCGGAATTTCCGTTGACGCAATGGAAGCACCATTAGAAATAAACTACTCTGAAAAGAGCAC<br>ATTTATTCTAGCCGAGGAGTAAAACATTTGACAGATGCTGCTCAGTTAATTGCCTCCCTCCTAATTCCTTTTTTTTATTCTGCGGCGTATGT<br>CTTGAACGCCTCGCAACG    |

Table S3. Normalized expression levels of KA genes in *A. flavus* strains

| Strain            | Gene              |      |                     |                    |                    |                  |             |      |        |
|-------------------|-------------------|------|---------------------|--------------------|--------------------|------------------|-------------|------|--------|
|                   | <i>kojA</i>       |      |                     | <i>kojR</i>        |                    |                  | <i>kojT</i> |      |        |
|                   | 48 h              | 72 h | Change <sup>c</sup> | 48 h               | 72 h               | Change           | 48 h        | 72 h | Change |
| KuPG <sup>a</sup> | 4.16 <sup>b</sup> | 3.18 | 2.0                 | 9.43               | 8.77               | 1.6              | 7.66        | 2.53 | 35.2   |
| $\Delta kojR$     | 7.32              | 8.09 | 0.6                 | 25.38 <sup>d</sup> | 25.11 <sup>d</sup> | 1.2 <sup>d</sup> | 8.41        | 8.61 | 0.9    |
| D-8               | 4.34              | 2.71 | 3.1                 | 5.59               | 7.11               | 0.3              | 6.90        | 2.82 | 16.9   |
| D-16              | 12.03             | 2.93 | 550.6               | 7.71               | 7.86               | 0.9              | 11.32       | 3.75 | 190.7  |
| D-20              | 9.46              | 2.00 | 176.1               | 7.21               | 6.67               | 1.5              | 10.06       | 3.24 | 112.9  |
| I-5               | 7.06              | 2.53 | 23.0                | 5.36               | 6.22               | 0.6              | 8.38        | 2.96 | 42.9   |
| I-9               | 7.96              | 4.13 | 14.2                | 5.53               | 5.45               | 1.1              | 9.22        | 5.99 | 9.3    |
| I-16              | 6.84              | 2.40 | 21.7                | 3.87               | 5.77               | 0.3              | 8.14        | 4.84 | 9.9    |

a: KuPG is the KA-producing control strain.

b: *A. flavus* 18S gene expression was used as the normalizer to obtain  $\Delta Ct$  values.

c: Fold of change in gene expression from 48 h to 72 h.

d: The Ct values are greater than 40, and the change thus is not meaningful.
